# Supplementary material for: Risk-based water quality thresholds for coliphages in surface waters: effect of temperature and contamination aging
Source: Royal Society of Chemistry journal article supplement (doi:10.1039/c9em00376b), 2019-01-01
Supplement: c9em00376b1.pdf [file c9em00376b1.pdf]

Risk-based water quality thresholds for coliphage in surface waters: Effect of temperature and contamination aging

Alexandria B. Boehm

Department of Civil & Environmental Engineering, Stanford University, Stanford, California,

USA 94305-4020

Supporting Information

*Environmental Science: Processes and Impacts*

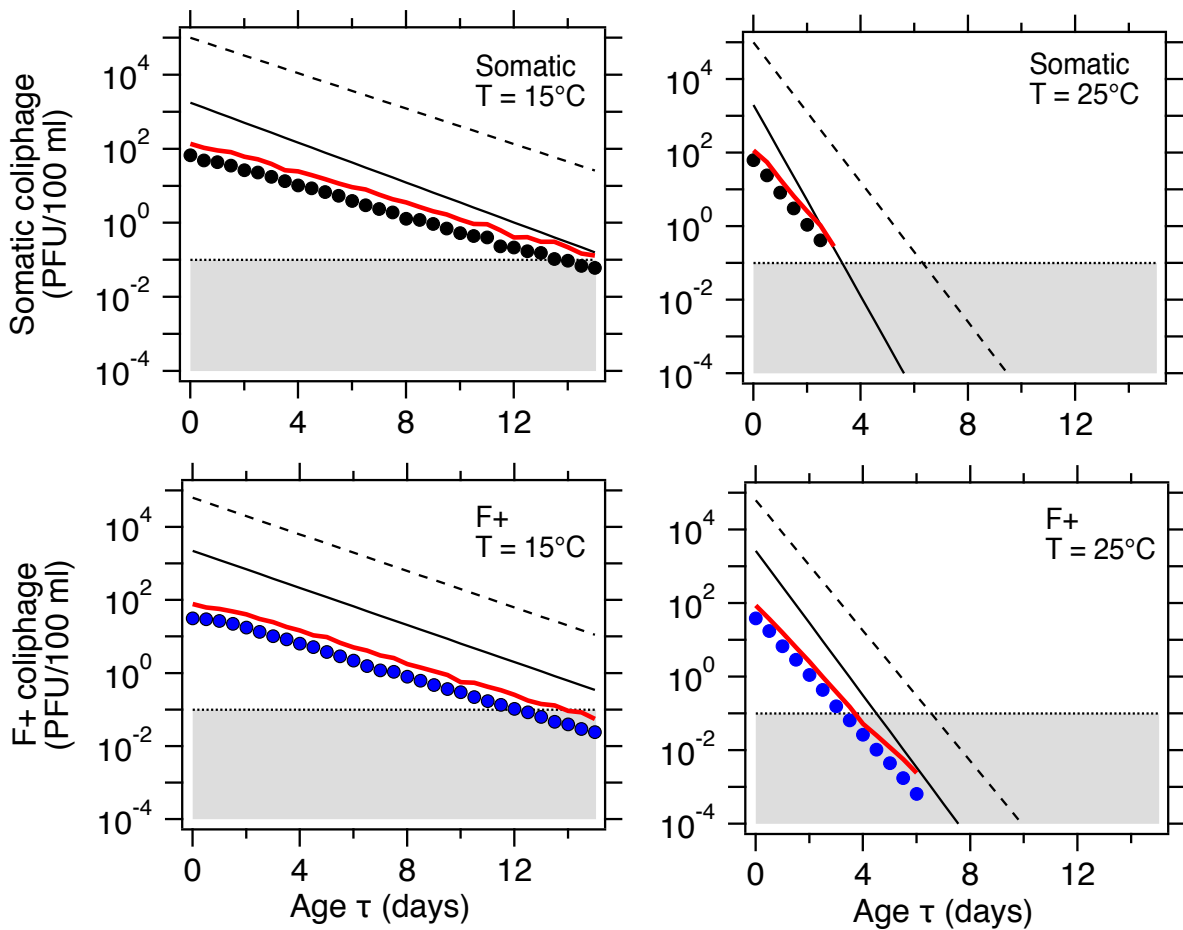

Figure S1. This is the same figure as Figure 3 in the manuscript except a red line has been added to each plot. This red line represents the risk-based threshold for the indicated coliphage at the indicated temperature when the dose response function for norovirus shown in Table 1 is replaced with a weighted result from the 2 published dose-response curves for norovirus. The methods for carrying out this approach are published in Brown et al.<sup>1</sup> and Soller et al.<sup>2</sup>. In brief, the risk of infection from exposure to norovirus is calculated using the dose-response function in Table 1 ( $P_{inf\_noro\_1}$ ), the risk of infection from exposure to norovirus is calculated using the dose-response function published by Messier et al.<sup>3</sup>:  $P_{inf\_noro\_2} = P \cdot \exp(1 - \mu/\lambda)$  where  $P = 0.72$  and  $\lambda = 1106$ , and then a weighted average of these two risks of infection is calculated and used as  $P_{inf\_noro}$  in the QMRA:  $P_{inf\_noro} = a \cdot P_{inf\_noro\_1} + (1-a) \cdot P_{inf\_noro\_2}$  where  $a$  is a random number drawn from a uniform distribution bounded by 0 and 1. The  $C_{max1}$  and  $C_{max2}$  lines (see caption of Figure 3) are unchanged. The risk-based thresholds are slightly higher when the 2 norovirus dose-response functions are used together. The risk-based thresholds are about 2 times higher, on average, for both indicators at both temperatures, as seen on the plot by comparing the red line with the solid markers on each panel.

| Indicator | Temp (°C) | Threshold (PFU/100 mL) when C <sub>max1</sub> is used | Threshold (PFU/100 mL) when C <sub>max2</sub> is used |
|-----------|-----------|-------------------------------------------------------|-------------------------------------------------------|
| F+        | 15        | 19                                                    | 3                                                     |
| F+        | 25        | 16                                                    | 2                                                     |
| Somatic   | 15        | 54                                                    | 8                                                     |
| Somatic   | 25        | 45                                                    | 7                                                     |

Table S1. Risk-based thresholds when contamination age is unknown when the weighted form of the 2 norovirus dose-response functions is used in the QMRA. Please see caption of Figure S1 for further information on the approach. Compared to Table S2 which shows the results when a single dose-response function is used, these risk-based thresholds are 2-6 times higher.

| Indicator | Temp (°C) | Threshold (PFU/100 mL) when C <sub>max1</sub> is used | Threshold (PFU/100 mL) when C <sub>max2</sub> is used |
|-----------|-----------|-------------------------------------------------------|-------------------------------------------------------|
| F+        | 15        | 3                                                     | 0.5                                                   |
| F+        | 25        | 3                                                     | 0.5                                                   |
| Somatic   | 15        | 14                                                    | 1                                                     |
| Somatic   | 25        | 14                                                    | 1                                                     |

Table S2. Risk-based thresholds when contamination age is unknown when the norovirus dose-response function in Table 1 alone is used in the QMRA.

## References

- (1) Brown, K. I.; Graham, K. E.; Soller, J. A.; Boehm, A. B. Estimating the Probability of Illness Due to Swimming in Recreational Water with a Mixture of Human- and Gull-Associated Microbial Source Tracking Markers. *Environ. Sci. Process. Impacts* **2017**, *19* (12), 1528–1541. <https://doi.org/10.1039/C7EM00316A>.
- (2) Soller, J. A.; Schoen, M.; Steele, J. A.; Griffith, J. F.; Schiff, K. C. Incidence of Gastrointestinal Illness Following Wet Weather Recreational Exposures: Harmonization of Quantitative Microbial Risk Assessment with an Epidemiologic Investigation of Surfers. *Water Res.* **2017**, *121*, 280–289. <https://doi.org/10.1016/j.watres.2017.05.017>.
- (3) Messner, M. J.; Berger, P.; Nappier, S. P. Fractional Poisson--a Simple Dose-Response Model for Human Norovirus. *Risk Anal.* **2014**, *34* (10), 1820–1829.
